# Supplementary material for: Modeling Oncogenic Signaling in Colon Tumors by Multidirectional Analyses of Microarray Data Directed for Maximization of Analytical Reliability
Source: PubMed Central journal article supplement (PMC2948500; doi:10.1371/journal.pone.0013091), 2010-10-01

**Figure S2**

MAS5.0

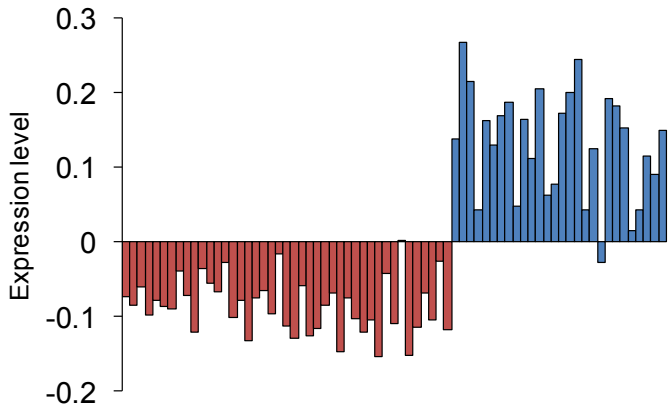

GCRMA+LVS

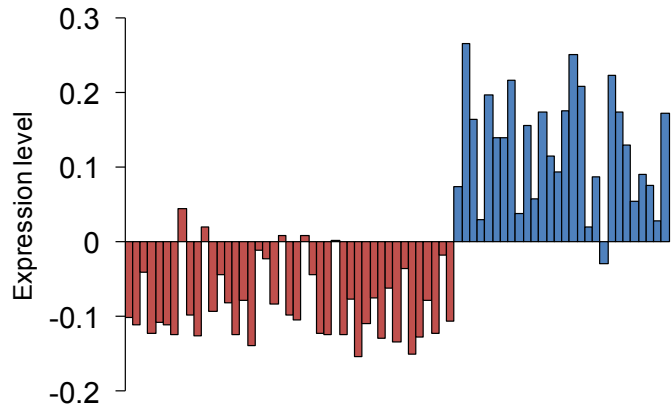

Supplement: pone.0013091.s002.pdf [file pone.0013091.s002.pdf]
