# Supplementary material for: Modeling Oncogenic Signaling in Colon Tumors by Multidirectional Analyses of Microarray Data Directed for Maximization of Analytical Reliability
Source: PubMed Central journal article supplement (PMC2948500; doi:10.1371/journal.pone.0013091), 2010-10-01
Supplement: pone.0013091.s003.pdf [file pone.0013091.s003.pdf]

**Figure S3**

NC – AD, FDR<0.05

Sabates-Bellver et al. Galamb et al. 2008-1

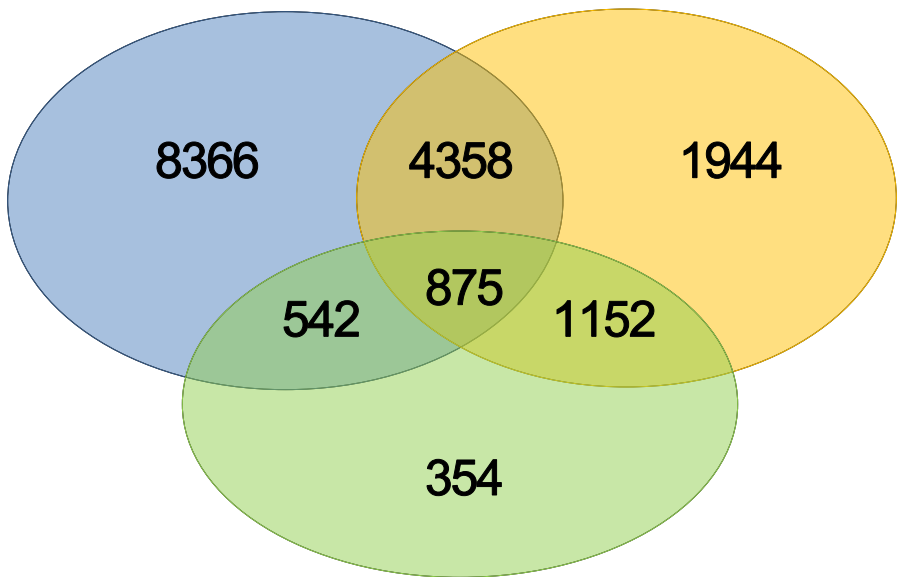

Galamb et al. 2008-2

NC – CRC, FDR<0.05

Galamb et al. 2010 Galamb et al. 2008-1

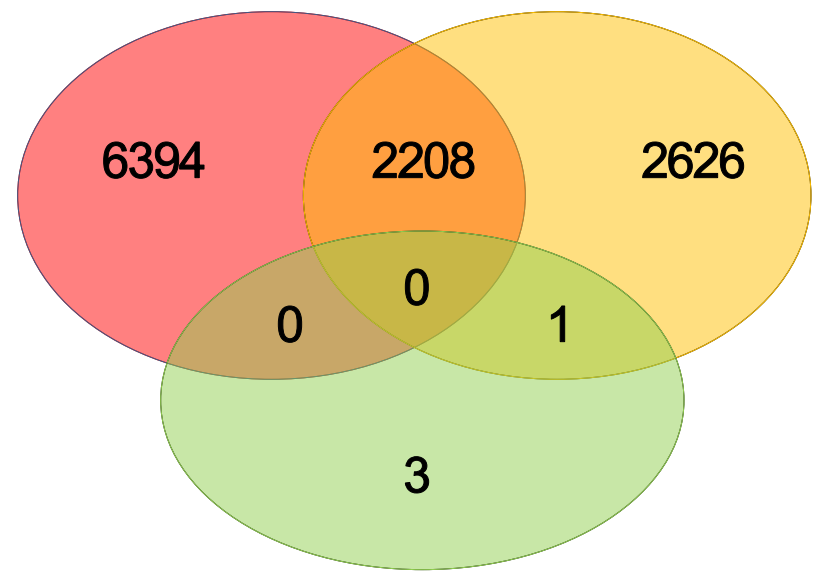

Galamb et al. 2008-2
